# Supplementary material for: Calcium Binding Promotes Prion Protein Fragment 90–231 Conformational Change toward a Membrane Destabilizing and Cytotoxic Structure
Source: PubMed Central journal article supplement (PMC3394757; doi:10.1371/journal.pone.0038314), 2012-07-11

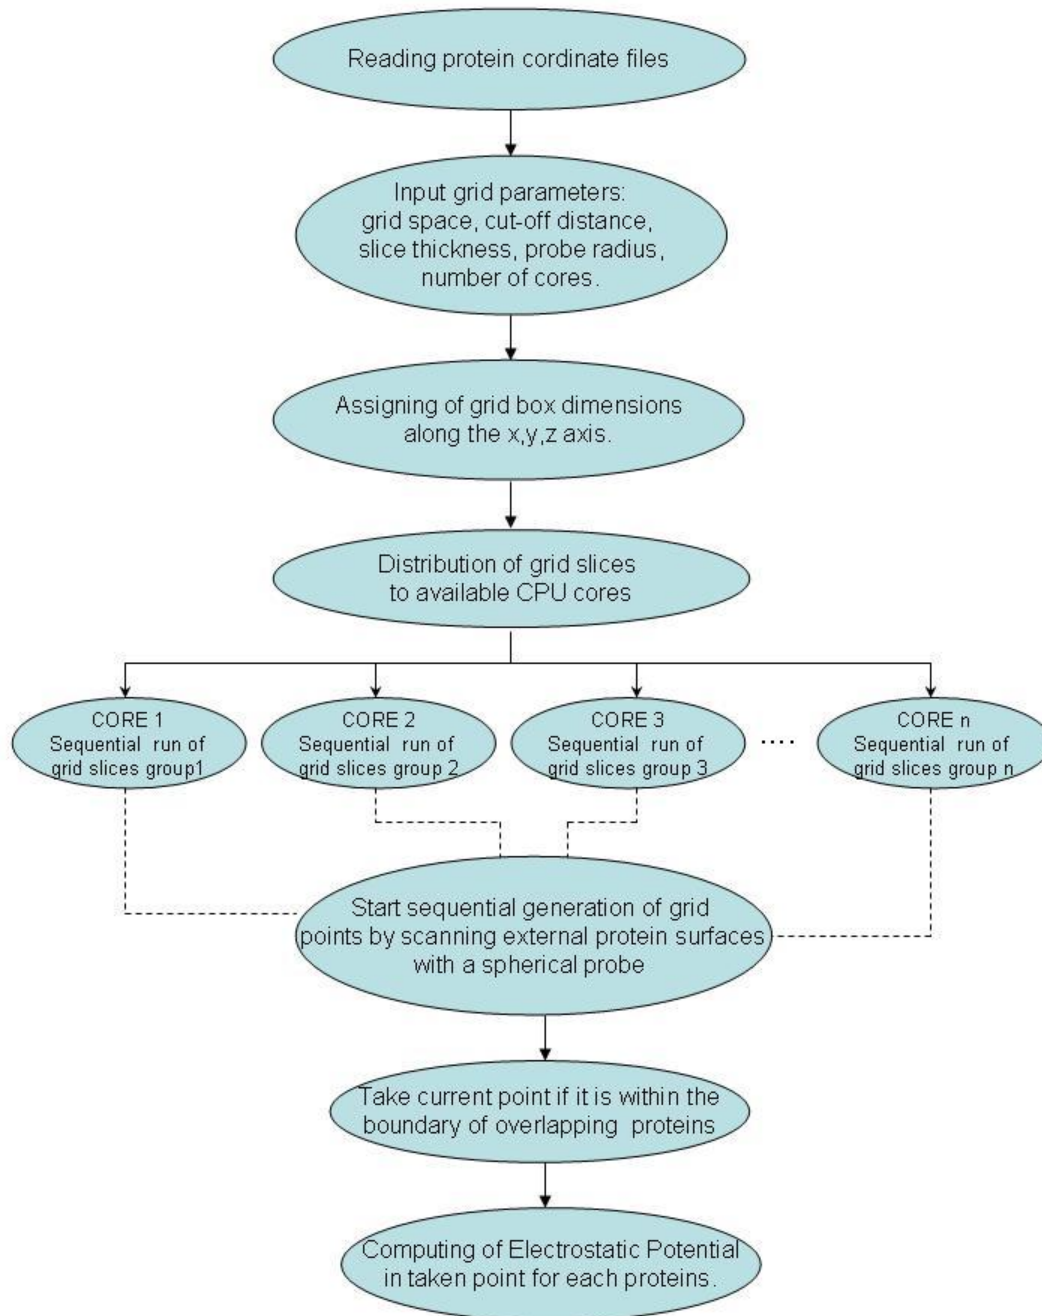

Supplement: pone.0038314.s001.pdf [file pone.0038314.s001.pdf]
