# Supplementary material for: Calcium Binding Promotes Prion Protein Fragment 90–231 Conformational Change toward a Membrane Destabilizing and Cytotoxic Structure
Source: PubMed Central journal article supplement (PMC3394757; doi:10.1371/journal.pone.0038314), 2012-07-11
Supplement: pone.0038314.s002.pdf [file pone.0038314.s002.pdf]

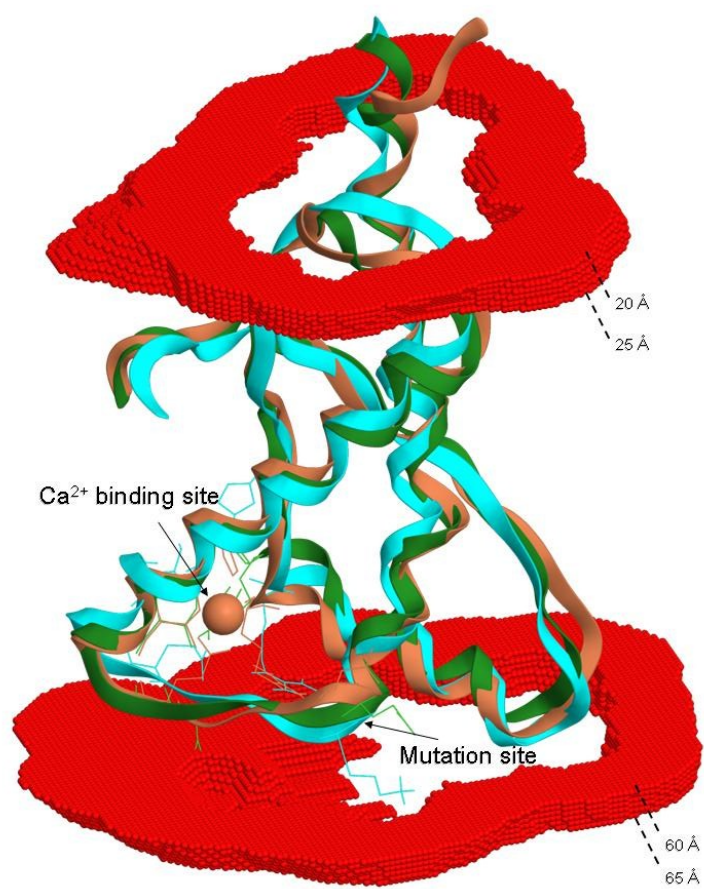

Figure S2 – Ribbon view of protein model I (dark green), II (light cyan) and III (orange) after superposition through minimization of C $\alpha$  RMSD. The grid points (red spheres) corresponding to the two minima of I/II similarity, the hypothesized Ca<sup>2+</sup> binding site and the mutation site are also displayed.
